# Supplementary material
Source: publisher figshare collection journal article supplement (https://frontiersin.figshare.com/ndownloader/files/34954422)
Supplement: Supplementary file 1 [file 34954422]

| Model no.                         | Flux rate, $\Delta V$<br>(km <sup>3</sup> /yr) | Depth, d (km) | Vertical<br>half-radius, a (km) | Chamber horizontal<br>half-radius, b (km) | Ice Thickness, $I_h$<br>(km) | Results shown in<br>Fig. # |
|-----------------------------------|------------------------------------------------|---------------|---------------------------------|-------------------------------------------|------------------------------|----------------------------|
| Flux rate simulations             |                                                |               |                                 |                                           |                              |                            |
| Fr1                               | 0.0001                                         | 5             | 0.62                            | 0.62                                      | 0, 0.01, 1, 2, 3             | 3, 7                       |
| Fr2                               | 0.0005                                         | 5             | 0.62                            | 0.62                                      | 0, 1, 2, 3                   | 3                          |
| Fr3                               | 0.001                                          | 5             | 0.62                            | 0.62                                      | 0, 1, 2, 3                   | 3                          |
| Fr4                               | 0.0024                                         | 5             | 0.62                            | 0.62                                      | 0, 1, 2, 3                   | 3, 4                       |
| Fr5                               | 0.005                                          | 5             | 0.62                            | 0.62                                      | 0, 1, 2, 3                   | 3, 4                       |
| Fr6                               | 0.0067                                         | 5             | 0.62                            | 0.62                                      | 0, 1, 2, 3                   | 3, 4                       |
| Fr7                               | 0.01                                           | 5             | 0.62                            | 0.62                                      | 0, 1, 2, 3                   | 3, 4                       |
| Fr8                               | 0.05                                           | 5             | 0.62                            | 0.62                                      | 0, 0.01, 1, 2, 3             | 3, 7                       |
| Fr9                               | 0.0001                                         | 5             | 0.98                            | 0.49                                      | 0, 1, 2, 3                   | 3                          |
| Fr10                              | 0.0005                                         | 5             | 0.98                            | 0.49                                      | 0, 1, 2, 3                   | 3                          |
| Fr11                              | 0.001                                          | 5             | 0.98                            | 0.49                                      | 0, 1, 2, 3                   | 3                          |
| Fr12                              | 0.0024                                         | 5             | 0.98                            | 0.49                                      | 0, 1, 2, 3                   | 3, 4                       |
| Fr13                              | 0.005                                          | 5             | 0.98                            | 0.49                                      | 0, 1, 2, 3                   | 3, 4                       |
| Fr14                              | 0.0067                                         | 5             | 0.98                            | 0.49                                      | 0, 1, 2, 3                   | 3, 4                       |
| Fr15                              | 0.01                                           | 5             | 0.98                            | 0.49                                      | 0, 1, 2, 3                   | 3, 4                       |
| Fr16                              | 0.05                                           | 5             | 0.98                            | 0.49                                      | 0, 1, 2, 3                   | 3                          |
| Fr17                              | 0.0001                                         | 5             | 0.39                            | 0.78                                      | 0, 1, 2, 3                   | 3                          |
| Fr18                              | 0.0005                                         | 5             | 0.39                            | 0.78                                      | 0, 1, 2, 3                   | 3                          |
| Fr19                              | 0.001                                          | 5             | 0.39                            | 0.78                                      | 0, 1, 2, 3                   | 3                          |
| Fr20                              | 0.0024                                         | 5             | 0.39                            | 0.78                                      | 0, 1, 2, 3                   | 3, 4                       |
| Fr21                              | 0.005                                          | 5             | 0.39                            | 0.78                                      | 0, 1, 2, 3                   | 3, 4                       |
| Fr22                              | 0.0067                                         | 5             | 0.39                            | 0.78                                      | 0, 1, 2, 3                   | 3, 4                       |
| Fr23                              | 0.01                                           | 5             | 0.39                            | 0.78                                      | 0, 1, 2, 3                   | 3, 4                       |
| Fr24                              | 0.05                                           | 5             | 0.39                            | 0.78                                      | 0, 1, 2, 3                   | 3                          |
| Additional flux rate simulations  |                                                |               |                                 |                                           |                              |                            |
| FV1                               | 0.0024                                         | 3             | 0.62                            | 0.62                                      | 0, 1, 2, 3                   | 4                          |
| FV2                               | 0.005                                          | 3             | 0.62                            | 0.62                                      | 0, 1, 2, 3                   | 4                          |
| FV3                               | 0.0067                                         | 3             | 0.62                            | 0.62                                      | 0, 1, 2, 3                   | 4                          |
| FV4                               | 0.01                                           | 3             | 0.62                            | 0.62                                      | 0, 1, 2, 3                   | 4                          |
| FV5                               | 0.0024                                         | 7             | 0.62                            | 0.62                                      | 0, 1, 2, 3                   | 4                          |
| FV6                               | 0.005                                          | 7             | 0.62                            | 0.62                                      | 0, 1, 2, 3                   | 4                          |
| FV7                               | 0.0067                                         | 7             | 0.62                            | 0.62                                      | 0, 1, 2, 3                   | 4                          |
| FV8                               | 0.01                                           | 7             | 0.62                            | 0.62                                      | 0, 1, 2, 3                   | 4                          |
| FV9                               | 0.0024                                         | 3             | 0.98                            | 0.49                                      | 0, 1, 2, 3                   | 4                          |
| FV10                              | 0.005                                          | 3             | 0.98                            | 0.49                                      | 0, 1, 2, 3                   | 4                          |
| FV11                              | 0.0067                                         | 3             | 0.98                            | 0.49                                      | 0, 1, 2, 3                   | 4                          |
| FV12                              | 0.01                                           | 3             | 0.98                            | 0.49                                      | 0, 1, 2, 3                   | 4                          |
| FV13                              | 0.0024                                         | 7             | 0.98                            | 0.49                                      | 0, 1, 2, 3                   | 4                          |
| FV14                              | 0.005                                          | 7             | 0.98                            | 0.49                                      | 0, 1, 2, 3                   | 4                          |
| FV15                              | 0.0067                                         | 7             | 0.98                            | 0.49                                      | 0, 1, 2, 3                   | 4                          |
| FV16                              | 0.01                                           | 7             | 0.98                            | 0.49                                      | 0, 1, 2, 3                   | 4                          |
| FV17                              | 0.0024                                         | 3             | 0.39                            | 0.78                                      | 0, 1, 2, 3                   | 4                          |
| FV18                              | 0.005                                          | 3             | 0.39                            | 0.78                                      | 0, 1, 2, 3                   | 4                          |
| FV19                              | 0.0067                                         | 3             | 0.39                            | 0.78                                      | 0, 1, 2, 3                   | 4                          |
| FV20                              | 0.01                                           | 3             | 0.39                            | 0.78                                      | 0, 1, 2, 3                   | 4                          |
| FV21                              | 0.0024                                         | 7             | 0.39                            | 0.78                                      | 0, 1, 2, 3                   | 4                          |
| FV22                              | 0.005                                          | 7             | 0.39                            | 0.78                                      | 0, 1, 2, 3                   | 4                          |
| FV23                              | 0.0067                                         | 7             | 0.39                            | 0.78                                      | 0, 1, 2, 3                   | 4                          |
| FV24                              | 0.01                                           | 7             | 0.39                            | 0.78                                      | 0, 1, 2, 3                   | 4                          |
| Depth simulations                 |                                                |               |                                 |                                           |                              |                            |
| Dp1                               | 0.0024                                         | 2             | 0.62                            | 0.62                                      | 0, 1, 2, 3                   | 5                          |
| Dp2                               | 0.0024                                         | 3             | 0.62                            | 0.62                                      | 0, 1, 2, 3                   | 5                          |
| Dp3                               | 0.0024                                         | 4             | 0.62                            | 0.62                                      | 0, 1, 2, 3                   | 5                          |
| Dp4                               | 0.0024                                         | 5             | 0.62                            | 0.62                                      | 0, 1, 2, 3                   | 5                          |
| Dp5                               | 0.0024                                         | 6             | 0.62                            | 0.62                                      | 0, 1, 2, 3                   | 5                          |
| Dp6                               | 0.0024                                         | 7             | 0.62                            | 0.62                                      | 0, 1, 2, 3                   | 5                          |
| Dp7                               | 0.0024                                         | 8             | 0.62                            | 0.62                                      | 0, 1, 2, 3                   | 5                          |
| Dp8                               | 0.0024                                         | 9             | 0.62                            | 0.62                                      | 0, 1, 2, 3                   | 5                          |
| Dp9                               | 0.0024                                         | 2             | 0.98                            | 0.49                                      | 0, 1, 2, 3                   | 5                          |
| Dp10                              | 0.0024                                         | 3             | 0.98                            | 0.49                                      | 0, 1, 2, 3                   | 5                          |
| Dp11                              | 0.0024                                         | 4             | 0.98                            | 0.49                                      | 0, 1, 2, 3                   | 5                          |
| Dp12                              | 0.0024                                         | 5             | 0.98                            | 0.49                                      | 0, 1, 2, 3                   | 5                          |
| Dp13                              | 0.0024                                         | 6             | 0.98                            | 0.49                                      | 0, 1, 2, 3                   | 5                          |
| Dp14                              | 0.0024                                         | 7             | 0.98                            | 0.49                                      | 0, 1, 2, 3                   | 5                          |
| Dp15                              | 0.0024                                         | 8             | 0.98                            | 0.49                                      | 0, 1, 2, 3                   | 5                          |
| Dp16                              | 0.0024                                         | 9             | 0.98                            | 0.49                                      | 0, 1, 2, 3                   | 5                          |
| Dp17                              | 0.0024                                         | 2             | 0.39                            | 0.78                                      | 0, 1, 2, 3                   | 5                          |
| Dp18                              | 0.0024                                         | 3             | 0.39                            | 0.78                                      | 0, 1, 2, 3                   | 5                          |
| Dp19                              | 0.0024                                         | 4             | 0.39                            | 0.78                                      | 0, 1, 2, 3                   | 5                          |
| Dp20                              | 0.0024                                         | 5             | 0.39                            | 0.78                                      | 0, 1, 2, 3                   | 5                          |
| Dp21                              | 0.0024                                         | 6             | 0.39                            | 0.78                                      | 0, 1, 2, 3                   | 5                          |
| Dp22                              | 0.0024                                         | 7             | 0.39                            | 0.78                                      | 0, 1, 2, 3                   | 5                          |
| Dp23                              | 0.0024                                         | 8             | 0.39                            | 0.78                                      | 0, 1, 2, 3                   | 5                          |
| Dp24                              | 0.0024                                         | 9             | 0.39                            | 0.78                                      | 0, 1, 2, 3                   | 5                          |
| Radius simulations*               |                                                |               |                                 |                                           |                              |                            |
| Ra1                               | 0.0024                                         | 5             | 0.5                             | 0.5                                       | 0, 1, 2, 3                   | 6                          |
| Ra2                               | 0.0024                                         | 5             | 1                               | 1                                         | 0, 1, 2, 3                   | 6                          |
| Ra3                               | 0.0024                                         | 5             | 1.5                             | 1.5                                       | 0, 1, 2, 3                   | 6                          |
| Ra4                               | 0.0024                                         | 5             | 2                               | 2                                         | 0, 1, 2, 3                   | 6                          |
| Ra5                               | 0.0024                                         | 5             | 2.5                             | 2.5                                       | 0, 1, 2, 3                   | 6                          |
| Ra6                               | 0.0024                                         | 5             | 3                               | 3                                         | 0, 1, 2, 3                   | 6                          |
| Ra7                               | 0.0024                                         | 5             | 3.5                             | 3.5                                       | 0, 1, 2, 3                   | 6                          |
| Ra8                               | 0.0024                                         | 5             | 4                               | 4                                         | 0, 1, 2, 3                   | 6                          |
| Ra9                               | 0.0024                                         | 5             | 0.5                             | 0.49                                      | 0, 1, 2, 3                   | 6                          |
| Ra10                              | 0.0024                                         | 5             | 1                               | 0.49                                      | 0, 1, 2, 3                   | 6                          |
| Ra11                              | 0.0024                                         | 5             | 1.5                             | 0.49                                      | 0, 1, 2, 3                   | 6                          |
| Ra12                              | 0.0024                                         | 5             | 2                               | 0.49                                      | 0, 1, 2, 3                   | 6                          |
| Ra13                              | 0.0024                                         | 5             | 2.5                             | 0.49                                      | 0, 1, 2, 3                   | 6                          |
| Ra14                              | 0.0024                                         | 5             | 3                               | 0.49                                      | 0, 1, 2, 3                   | 6                          |
| Ra15                              | 0.0024                                         | 5             | 3.5                             | 0.49                                      | 0, 1, 2, 3                   | 6                          |
| Ra16                              | 0.0024                                         | 5             | 4                               | 0.49                                      | 0, 1, 2, 3                   | 6                          |
| Ra17                              | 0.0024                                         | 5             | 0.39                            | 0.5                                       | 0, 1, 2, 3                   | 6                          |
| Ra18                              | 0.0024                                         | 5             | 0.39                            | 1                                         | 0, 1, 2, 3                   | 6                          |
| Ra19                              | 0.0024                                         | 5             | 0.39                            | 1.5                                       | 0, 1, 2, 3                   | 6                          |
| Ra20                              | 0.0024                                         | 5             | 0.39                            | 2                                         | 0, 1, 2, 3                   | 6                          |
| Ra21                              | 0.0024                                         | 5             | 0.39                            | 2.5                                       | 0, 1, 2, 3                   | 6                          |
| Ra22                              | 0.0024                                         | 5             | 0.39                            | 3                                         | 0, 1, 2, 3                   | 6                          |
| Ra23                              | 0.0024                                         | 5             | 0.39                            | 3.5                                       | 0, 1, 2, 3                   | 6                          |
| Ra24                              | 0.0024                                         | 5             | 0.39                            | 4                                         | 0, 1, 2, 3                   | 6                          |
| Seasonal ice variation simulation |                                                |               |                                 |                                           |                              |                            |
| Se1                               | 0.0001                                         | 3             | 0.62                            | 0.62                                      | 0.01, 1                      | 7                          |
| Se2                               | 0.05                                           | 3             | 0.62                            | 0.62                                      | 0.01, 1                      | 7                          |
| Westdahl Volcano simulation       |                                                |               |                                 |                                           |                              |                            |
| Wv1                               | 0.0024                                         | 7.2           | 1.39                            | 1.39                                      | 0, 1                         | 8                          |
